# Supplementary material for: A decision-space model explains context-specific decision-making
Source: Nat Commun. 2025 Aug 14;16:7437. doi: 10.1038/s41467-025-61466-x (PMC12354707; doi:10.1038/s41467-025-61466-x)
Supplement: Supplementary file 4 — Source Data [file 41467_2025_61466_MOESM4_ESM.xlsx]

## Sheet: M4CDE (PV+)
Inhibition Data
Mouse ID	Optogenetic Manipulation	Stressed	Choice of Chocolate Milk (%)			Associated Graph	M4E
2515	No	No	48
2515	No	No	48			No manipulation	Inhibition	Control
2515	No	No	46.6667		Average:	49.8513	78.9962	51.7403
2513	No	No	55		SE:	1.27068	3.47435	1.71015
2347	No	No	50		Subject #:	6	6	5			Analysis of Variance (One-Way)
2347	No	No	54.5455		Data point #:	15	8	11
3482	No	No	50								Summary
2513	No	No	55								Groups	Sample size	Sum	Mean	Variance
3482	No	No	55								Control	11	569.143	51.7403	32.1707
2513	No	No	52.1739								Stressed	15	747.77	49.8513	24.2195
3482	No	No	45.1613								Optogenetic	8	631.969	78.9962	96.569
1427	No	No	56
1427	No	No	40								ANOVA
1658	No	No	42.2222								Source of Variation	SS	df	MS	F	p-value	F crit
1658	No	No	50								Between Groups	4938.04	2	2469.02	57.2574	3.89981e-11	3.30482
2515	Yes	No	84								Within Groups	1336.76	31	43.1214
2347	Yes	No	73.3333								Total	6274.8	33
2513	Yes	No	90
2513	Yes	No	75
3482	Yes	No	90
3482	Yes	No	72.4138
1427	Yes	No	85
1658	Yes	No	62.2222
2149	Yes (Control)	No	50
5051	Yes (Control)	No	57.1429
2149	Yes (Control)	No	50
2149	Yes (Control)	No	45
5051	Yes (Control)	No	60
540	Yes (Control)	No	45
540	Yes (Control)	No	52
1927	Yes (Control)	No	50
1927	Yes (Control)	No	55
1653	Yes (Control)	No	60
1653	Yes (Control)	No	45
Excitation Data
Mouse ID	Optogenetic Manipulation	Stressed	Choice of Chocolate Milk (%)			Associated Graph	M4C
3481	No	No	55				(Stressed)	(Stressed)	(Stressed)
2349	No	No	50			No manipulation	No manipulation	Excitation	Control
2662	No	No	45		Average:	52.0667	75.8516	23.4794	76.63
2662	No	No	50		SE:	1.68598	3.13344	6.49392	4.17323
2349	No	No	70		Subject #:	5	5	5	6
2349	No	No	50		Data point #:	15	10	9	13
2662	No	No	55								Analysis of Variance (One-Way)
3481	No	No	55
3481	No	No	55								Summary
3481	No	No	56								Groups	Sample size	Sum	Mean	Variance
1833	No	No	45								Control	13	996.19	76.63	226.406
1833	No	No	50								Non-stressed	15	781	52.0667	42.6381
1833	No	No	45								Stressed	10	758.516	75.8516	98.1843
1664	No	No	45								Optogenetic	9	211.315	23.4794	379.539
1664	No	No	55
2662	No	Yes	64.5161								ANOVA
2662	No	Yes	75								Source of Variation	SS	df	MS	F	p-value	F crit
3481	No	Yes	65								Between Groups	18942.5	3	6314.17	37.5335	4.47582e-12	2.82163
3481	No	Yes	84								Within Groups	7233.78	43	168.227
2349	No	Yes	65								Total	26176.3	46
2349	No	Yes	90
1664	No	Yes	70
1664	No	Yes	75
1833	No	Yes	90
1833	No	Yes	80
2662	Yes	Yes	11.7647
2662	Yes	Yes	37.1429
2349	Yes	Yes	7.40741
3481	Yes	Yes	70
3481	Yes	Yes	20
1664	Yes	Yes	15
1833	Yes	Yes	20
1664	Yes	Yes	20
1833	Yes	Yes	10
5051	Yes (Control)	Yes	100
2337	Yes (Control)	Yes	100
2149	Yes (Control)	Yes	55
5051	Yes (Control)	Yes	65
2149	Yes (Control)	Yes	55
5051	Yes (Control)	Yes	80
2149	Yes (Control)	Yes	90
540	Yes (Control)	Yes	76.1905
540	Yes (Control)	Yes	70
1927	Yes (Control)	Yes	65
1927	Yes (Control)	Yes	70
1653	Yes (Control)	Yes	85
1653	Yes (Control)	Yes	85
Excitation Temporarily Cures Effect of Stress
PV:	(Choice of Chocolate Milk)							Associated Graph	M4D
Mouse ID	Baseline 1	Baseline 2	Optogenetic Manipulation	Post-Opto #1	Post-Opto #2	Post-Opto #3
2662	64.5161	75	11.7647	50	55	55
2662	64.5161	75	37.1429	56	65	70
3481	65	84	70	56
3481	65	84	20	40	55	40
2349	65	90	7.40741	10	45	35
1664	70	75	15	45	50	45
1833	90	80	20	60	50	55
1833	90	80	10	55	60	50
1664	70	75	20	35	50	45
Control:	(Choice of Chocolate Milk)
Mouse ID	CB1 (opto manip)	CB2 (opto manip)	CB3 (opto manip)	CB4 (opto manip)	CB5 (opto manip)	CB6 (opto manip)
2149	80	55	45	55	70	90
5051	73.3333	100	65	60	80	70
1927	70	65	70
540	80	76.1905	70
1653	90	85	85
									CB1	CB2	Optogenetic	CB3	CB4	CB5
								Average (Control):	78.6667	76.2381	67	57.5	75	80
								SE (Control):	3.43188	7.80626	6.44205	2.5	5	10
								Average (PV):	71.5591	79.7778	23.4794	45.2222	53.75	49.375
								SE (PV):	3.5615	1.79333	6.49392	5.19288	2.26582	3.83097
								PV:	9 trendlines	5 contributing mice
								Control:	5 trendlines	5 contributing mice

## Sheet: S1D (Immob.)
BB	(Choice of chocolate milk)	(Choice of mixture)		(Choice of chocolate milk)	(Choice of mixture)	All points are NON-OPTO	CB	(Choice of chocolate milk)	(Choice of mixture)		(Choice of chocolate milk)	(Choice of mixture)
	BEFORE STRESS			AFTER STRESS		t-test, BB, before/after:		BEFORE STRESS			AFTER STRESS
	Avg:	36.38		Avg:	38.4206	0.103348		Avg:	48.0591		Avg:	24.445
	SE:	0.831539		SE:	0.928572	t-test, CB, before/after:		SE:	0.964221		SE:	1.62306
	n:	23		n:	14	4.87713e-20		n:	17		n:	13
	# points:	114		# points:	116			# points:	38		# points:	34
5051	62.5	37.5	2149	70	30	KEY:	5302	45	55	2149	80	20
5051	75	25	2149	60	40	Control	5302	55	45	5051	73.3333	26.6667								SE
5079	60	40	2149	55	45	PV Excitatory	5302	50	50	2149	45	55						1	48.0591	0.964221
5302	60	40	2149	55	45	Sepw Inhibitory	2334	50	50	2149	70	30						2	24.445	1.62306
5302	55.5556	44.4444	2149	60	40		2149	60	40	5051	60	40						3	36.38	0.831539
5302	60	40	5051	70	30		1656	58.0645	41.9355	5051	70	30						4	38.4206	0.928572
5302	60	40	5051	53.3333	46.6667		540	43.4783	56.5217	1927	70	30						1.1	55
5051	65	35	2337	65	35		540	54.5455	45.4545	540	80	20						1.1	45
5051	65.3846	34.6154	2337	60	40		1653	55	45	1653	90	10						1.1	50
2336	45	55	2337	55	45		1927	60	40	2662	64.5161	35.4839						1.1	50
2334	60	40	2149	35	65		3481	55	45	2662	75	25						1.1	40
2334	60	40	2149	86.6667	13.3333		2349	50	50	3481	65	35						1.1	41.9355
2149	60	40	2149	55	45		2662	45	55	3481	84	16						1.1	56.5217
2149	75	25	2149	60	40		2662	50	50	2349	65	35						1.1	45.4545
2149	50	50	2149	60	40		2349	70	30	2349	90	10						1.1	45
2149	75	25	5051	55	45		2349	50	50	1664	70	30						1.1	40
2149	60	40	2149	65	35		2662	55	45	1664	75	25						1.1	45
5051	70	30	5051	35	65		3481	55	45	1833	90	10						1.1	50
2337	60	40	5051	65	35		3481	55	45	1833	80	20						1.1	55
1653	70	30	2149	40	60		3481	56	44	7382	75	25						1.1	50
1653	85	15	1927	65	35		1833	45	55	7382	85	15						1.1	30
1653	70	30	1927	60	40		1833	50	50	7382	85	15						1.1	50
1796	60	40	1927	60	40		1833	45	55	7382	80	20						1.1	45
1796	70	30	1927	65	35		1664	45	55	M1	85	15						1.1	45
1796	50	50	540	60	40		1664	55	45	M1	80	20						1.1	45
1796	70	30	540	65	35		7306	35	65	M1	66.6667	33.3333						1.1	44
1796	45	55	540	45	55		7306	50	50	M1	68	32						1.1	55
1656	60	40	1653	70	30		7306	55	45	7306	80	20						1.1	50
1656	60	40	1653	60	40		M1	55	45	7306	82.3529	17.6471		(Before stress)	(After stress)	(Before stress)	(After stress)	1.1	55
1656	75	25	1653	75	25		M1	55	45	7306	80	20		Control, CBC	Immobile, CBC	Control, BBD	Immobile, BBD	1.1	55
1656	70	30	2662	55	45		7382	46.6667	53.3333	7306	75	25	n:	17	13	23	14	1.1	45
1656	65	35	2662	60	40		7382	50	50	7306	75	25	# data points:	38	34	114	116	1.1	65
1657	60	40	2662	60	40		7382	55	45	M1	75	25						1.1	50
1657	70	30	2662	65	35		7382	50	50	7382	80	20		t-test, BB, before/after:		0.103348		1.1	45
1657	60	40	2662	80.9524	19.0476		7382	55	45					t-test, CB, before/after:		4.87713e-20		1.1	45
540	60	40	2662	45.4545	54.5455		8387	55	45									1.1	45
540	55	45	2662	65	35		8387	50	50									1.1	53.3333
540	55	45	2662	50	50		7867	50	50									1.1	50
1653	85	15	2662	60	40													1.1	45
1653	65	35	2662	65	35													1.1	50
1653	93.3333	6.66667	2662	70	30													1.1	45
1653	60	40	2662	60	40													1.1	45
1653	65	35	2662	75	25													1.1	50
1653	65	35	2662	60	40													1.1	50
1653	60	40	2662	52	48													2.1	20
1927	60	40	2349	60	40													2.1	26.6667
1927	90	10	2349	60	40													2.1	55
1927	35	65	2349	60	40													2.1	30
1927	60	40	2349	65	35													2.1	40
1927	60	40	2349	54.1667	45.8333													2.1	30
1927	70	30	2349	60	40													2.1	30
2349	65	35	3481	80	20													2.1	20
2349	55	45	3481	80	20													2.1	10
2662	72.2222	27.7778	3481	55	45													2.1	35.4839
2662	55	45	3481	55	45													2.1	25
2662	60	40	3481	50	50													2.1	35
2662	55	45	3481	56	44													2.1	16
3481	65	35	2662	59.0909	40.9091													2.1	35
3481	65	35	2662	80	20													2.1	10
2662	65	35	2662	55	45													2.1	30
3481	62.5	37.5	2349	60	40													2.1	25
3481	56.6667	43.3333	2349	60	40													2.1	10
2349	60	40	3481	55	45													2.1	20
2349	60	40	3481	75	25													2.1	25
2662	65	35	2349	80	20													2.1	15
3481	60	40	2349	70	30													2.1	15
3481	70	30	2349	60	40													2.1	20
3481	70	30	3481	60	40													2.1	15
3481	65	35	3481	70	30													2.1	20
3481	70	30	3481	56	44													2.1	33.3333
1833	65	35	3481	65	35													2.1	32
1833	75	25	1664	70	30													2.1	20
1833	60	40	1664	65	35													2.1	17.6471
1833	60	40	1664	35	65													2.1	20
1833	50	50	1664	65	35													2.1	25
1833	60	40	1664	65	35													2.1	25
1833	65	35	1664	70	30													2.1	25
1664	60	40	1664	65	35													2.1	20
1664	65	35	1664	70	30													3.1	37.5
1664	55	45	1664	60	40													3.1	25
1664	75	25	1833	60	40													3.1	40
1664	60	40	1833	65	35													3.1	40
1664	53.3333	46.6667	1833	40	60													3.1	44.4444
1664	55	45	1833	65	35													3.1	40
1664	45	55	1833	70	30													3.1	40
1664	70	30	1833	70	30													3.1	35
1664	60	40	1833	45	55													3.1	34.6154
1664	65	35	1833	70	30													3.1	55
7306	70	30	1833	65	35													3.1	40
7306	60	40	1664	65	35													3.1	40
7306	65	35	1664	30	70													3.1	40
M1	85	15	1664	35	65													3.1	25
M1	68.1818	31.8182	1664	70	30													3.1	50
M1	64	36	1833	65	35													3.1	25
M1	64	36	1833	70	30													3.1	40
M1	55	45	1833	65	35													3.1	30
M1	55	45	1833	75	25													3.1	40
7382	70	30	7382	65	35													3.1	30
7382	80	20	7382	60	40													3.1	15
7382	70	30	7382	70	30													3.1	30
7382	65	35	M1	70	30													3.1	40
7382	60	40	M1	70	30													3.1	30
8387	75	25	M1	60	40													3.1	50
8387	65	35	M1	70	30													3.1	30
8387	60	40	M1	60	40													3.1	55
8387	60	40	7306	60	40													3.1	40
7867	55	45	7306	65	35													3.1	40
7867	65	35	7306	65	35													3.1	25
7867	75	25	7306	54.5455	45.4545													3.1	30
7867	70	30	7306	60	40													3.1	35
7867	60	40	7306	65	35													3.1	40
7867	60	40	7306	70	30													3.1	30
7867	65	35	M1	55	45													3.1	40
7867	60	40	M1	55	45													3.1	40
			7382	65	35													3.1	45
			7382	65	35													3.1	45
																		3.1	15
																		3.1	35
																		3.1	6.66667
																		3.1	40
																		3.1	35
																		3.1	35
																		3.1	40
																		3.1	40
																		3.1	10
																		3.1	65
																		3.1	40
																		3.1	40
																		3.1	30
																		3.1	35
																		3.1	45
																		3.1	27.7778
																		3.1	45
																		3.1	40
																		3.1	45
																		3.1	35
																		3.1	35
																		3.1	35
																		3.1	37.5
																		3.1	43.3333
																		3.1	40
																		3.1	40
																		3.1	35
																		3.1	40
																		3.1	30
																		3.1	30
																		3.1	35
																		3.1	30
																		3.1	35
																		3.1	25
																		3.1	40
																		3.1	40
																		3.1	50
																		3.1	40
																		3.1	35
																		3.1	40
																		3.1	35
																		3.1	45
																		3.1	25
																		3.1	40
																		3.1	46.6667
																		3.1	45
																		3.1	55
																		3.1	30
																		3.1	40
																		3.1	35
																		3.1	30
																		3.1	40
																		3.1	35
																		3.1	15
																		3.1	31.8182
																		3.1	36
																		3.1	36
																		3.1	45
																		3.1	45
																		3.1	30
																		3.1	20
																		3.1	30
																		3.1	35
																		3.1	40
																		3.1	25
																		3.1	35
																		3.1	40
																		3.1	40
																		3.1	45
																		3.1	35
																		3.1	25
																		3.1	30
																		3.1	40
																		3.1	40
																		3.1	35
																		3.1	40
																		4.1	30
																		4.1	40
																		4.1	45
																		4.1	45
																		4.1	40
																		4.1	30
																		4.1	46.6667
																		4.1	35
																		4.1	40
																		4.1	45
																		4.1	65
																		4.1	13.3333
																		4.1	45
																		4.1	40
																		4.1	40
																		4.1	45
																		4.1	35
																		4.1	65
																		4.1	35
																		4.1	60
																		4.1	35
																		4.1	40
																		4.1	40
																		4.1	35
																		4.1	40
																		4.1	35
																		4.1	55
																		4.1	30
																		4.1	40
																		4.1	25
																		4.1	45
																		4.1	40
																		4.1	40
																		4.1	35
																		4.1	19.0476
																		4.1	54.5455
																		4.1	35
																		4.1	50
																		4.1	40
																		4.1	35
																		4.1	30
																		4.1	40
																		4.1	25
																		4.1	40
																		4.1	48
																		4.1	40
																		4.1	40
																		4.1	40
																		4.1	35
																		4.1	45.8333
																		4.1	40
																		4.1	20
																		4.1	20
																		4.1	45
																		4.1	45
																		4.1	50
																		4.1	44
																		4.1	40.9091
																		4.1	20
																		4.1	45
																		4.1	40
																		4.1	40
																		4.1	45
																		4.1	25
																		4.1	20
																		4.1	30
																		4.1	40
																		4.1	40
																		4.1	30
																		4.1	44
																		4.1	35
																		4.1	30
																		4.1	35
																		4.1	65
																		4.1	35
																		4.1	35
																		4.1	30
																		4.1	35
																		4.1	30
																		4.1	40
																		4.1	40
																		4.1	35
																		4.1	60
																		4.1	35
																		4.1	30
																		4.1	30
																		4.1	55
																		4.1	30
																		4.1	35
																		4.1	35
																		4.1	70
																		4.1	65
																		4.1	30
																		4.1	35
																		4.1	30
																		4.1	35
																		4.1	25
																		4.1	35
																		4.1	40
																		4.1	30
																		4.1	30
																		4.1	30
																		4.1	40
																		4.1	30
																		4.1	40
																		4.1	40
																		4.1	35
																		4.1	35
																		4.1	45.4545
																		4.1	40
																		4.1	35
																		4.1	30
																		4.1	45
																		4.1	45
																		4.1	35
																		4.1	35
